1 **TITLE**

2 **Hsf1 and Hsp70 constitute a two-component feedback loop that regulates**  
3 **the yeast heat shock response**

4  
5 **AUTHORS**

6 Joanna Krakowiak<sup>1,\*</sup>, Xu Zheng<sup>1,\*</sup>, Nikit Patel<sup>2,\*</sup>, Jayamani Anandhakumar<sup>4,5</sup>, Kendra Valerius<sup>1</sup>,  
7 David S. Gross<sup>4,#</sup>, Ahmad S. Khalil<sup>2,3,#</sup>, David Pincus<sup>1,#</sup>

8  
9 <sup>1</sup> Whitehead Institute for Biomedical Research, Cambridge, USA

10 <sup>2</sup> Department of Biomedical Engineering and Biological Design Center, Boston University,  
11 Boston, USA

12 <sup>3</sup> Wyss Institute for Biologically Inspired Engineering, Harvard University, Boston, USA

13 <sup>4</sup> Department of Biochemistry and Molecular Biology, Louisiana State University Health  
14 Sciences Center, Shreveport, USA

15 <sup>5</sup> Present address: Department of Biochemistry and Biophysics, Texas A&M University, College  
16 Station, USA

17 \* These authors contributed equally

18 # Correspondence: [dgross@lsuhsc.edu](mailto:dgross@lsuhsc.edu), [khalil@bu.edu](mailto:khalil@bu.edu), [pincus@wi.mit.edu](mailto:pincus@wi.mit.edu)

19

20 **ABSTRACT**

21 Models for regulation of the eukaryotic heat shock response typically invoke a negative  
22 feedback loop consisting of the transcriptional activator Hsf1 and a molecular chaperone  
23 encoded by an Hsf1 target gene. Previously, we identified Hsp70 as the chaperone responsible  
24 for Hsf1 repression in *Saccharomyces cerevisiae* and constructed a mathematical model based  
25 on Hsp70-mediated negative feedback that recapitulated the dynamic activity of Hsf1 during  
26 heat shock. The model was based on two assumptions: dissociation of Hsp70 activates Hsf1,  
27 and transcriptional induction of Hsp70 deactivates Hsf1. Here we validated these assumptions.  
28 First, we severed the feedback loop by uncoupling Hsp70 expression from Hsf1 regulation. As  
29 predicted by the model, Hsf1 was unable to efficiently deactivate in the absence of Hsp70  
30 transcriptional induction. Next we mapped a discrete Hsp70 binding site on Hsf1 to a motif in the  
31 C-terminal activation domain known as conserved element 2 (CE2). Removal of CE2 resulted in  
32 increased Hsf1 activity under non-heat shock conditions and delayed deactivation kinetics. In  
33 addition, we uncovered a role for the N-terminal domain of Hsf1 in negatively regulating DNA  
34 binding. These results reveal the quantitative control mechanisms underlying the feedback loop  
35 charged with maintaining cytosolic proteostasis.

36

## 37 INTRODUCTION

38 The heat shock response is a transcriptional program conserved in eukaryotes from yeast to  
39 humans in which genes encoding molecular chaperones and other components of the protein  
40 homeostasis (proteostasis) machinery are activated to counteract proteotoxic stress (Anckar  
41 and Sistonen, 2011; Richter et al., 2010). The conserved master transcriptional regulator of the  
42 heat shock response, Heat shock factor 1 (Hsf1), binds as a trimer to its cognate DNA motif –  
43 the heat shock element (HSE) – in the promoters and enhancers of its target genes (Gross et  
44 al., 1990; Hentze et al., 2016; Sorger and Nelson, 1989; Xiao et al., 1991).

45  
46 In yeast, Hsf1 is essential under all conditions because it is required to drive the high level of  
47 basal chaperone expression needed to sustain growth (McDaniel et al., 1989; Solis et al., 2016).  
48 Mammalian Hsf1 is dispensable under non-heat shock conditions because it exclusively  
49 controls stress-inducible expression of its target regulon, while high-level basal chaperone  
50 expression is Hsf1-independent (Mahat et al., 2016). Notably, *hsf1*<sup>-/-</sup> mice are not only viable but  
51 are in fact resistant to many laboratory cancer models, and Hsf1 has been shown to play pro-  
52 cancer roles both in the tumor cells and the supporting stroma (Dai et al., 2012; Dai et al., 2007;  
53 Santagata et al., 2011; Scherz-Shouval et al., 2014). In addition to supplying high levels of  
54 chaperones to cancer cells, Hsf1 takes on specialized transcriptional roles to support malignant  
55 growth, and its activity is associated with poor prognosis in a range of human cancers (Mendillo  
56 et al., 2012; Santagata et al., 2011; Scherz-Shouval et al., 2014). Conversely, lack of Hsf1  
57 activity has been proposed to contribute to the development of neurodegenerative diseases  
58 associated with protein aggregates (Gomez-Pastor et al., 2017; Neef et al., 2011). Despite the  
59 potential therapeutic benefits of modulating Hsf1 activity, a quantitative description of the  
60 regulatory mechanisms that control its activity in any cell type remains lacking.

61

62 Phosphorylation, SUMOylation, acetylation, chaperone binding (Hsp40, Hsp70, Hsp90 and/or  
63 TRiC/CCT), intrinsic thermosensing and an RNA aptamer have all been suggested to regulate  
64 Hsf1 in various model systems (Anckar and Sistonen, 2011; Baler et al., 1993; Cotto et al.,  
65 1996; Hentze et al., 2016; Hietakangas et al., 2003; Holmberg et al., 2001; Kline and Morimoto,  
66 1997; Neef et al., 2014; Shamovsky et al., 2006; Shi et al., 1998; Westerheide et al., 2009; Xia  
67 et al., 1998; Zheng et al., 2016; Zhong et al., 1998; Zou et al., 1998). These diverse  
68 mechanisms can operate on Hsf1 by impinging on a number of steps required for activation  
69 including nuclear localization, trimerization, DNA binding and recruitment of the transcriptional  
70 machinery. Our recent work in the budding yeast *Saccharomyces cerevisiae* demonstrated that  
71 binding and dissociation of the chaperone Hsp70 is the primary ON/OFF switch for Hsf1, while  
72 phosphorylation is dispensable for activation but serves to amplify the transcriptional output  
73 (Zheng et al., 2016).

74  
75 Based on these results, we generated a mathematical model of the yeast heat shock response.  
76 Given that we observed heat shock-dependent dissociation of Hsp70 from Hsf1, and that the  
77 genes encoding Hsp70 are major targets of Hsf1, we centered the model on a simple feedback  
78 loop in which Hsf1 activates expression of Hsp70, which in turn represses Hsf1 activity. While  
79 the model was able to recapitulate experimental data of Hsf1 activity during heat shock and  
80 correctly predicted the outcome of defined perturbations, its two central tenets remain untested:  
81 1) Hsp70 directly binds to Hsf1 at a specific regulatory site; 2) Transcriptional induction of  
82 Hsp70 provides negative feedback required to deactivate Hsf1. Here, we provide direct  
83 evidence supporting these core model assumptions by severing the transcriptional feedback  
84 loop, rendering Hsf1 unable to deactivate, and mapping a direct Hsp70 binding site on Hsf1  
85 through which Hsp70 represses its potent C-terminal transactivation domain. These results  
86 suggest that the heat shock response circuitry in this model system can be abstracted to a  
87 simple two-component feedback loop.

88

## 89 **RESULTS**

### 90 **Hsp70-mediated negative feedback is required to deactivate Hsf1**

91 Our model of the heat shock response is centered on a feedback loop in which Hsf1 regulates  
92 expression of its negative modulator, Hsp70 (Figure 1A). When the temperature is raised, the  
93 concentration of unfolded proteins exceeds the capacity of Hsp70. Hsp70 is titrated away from  
94 Hsf1, freeing Hsf1 to induce more Hsp70. Once sufficient Hsp70 has been produced to restore  
95 proteostasis, Hsp70 binds and deactivates Hsf1. In addition to producing more Hsp70, Hsf1 also  
96 induces expression of an inert YFP reporter that can be used as a proxy for Hsf1 activity. In the  
97 yeast strains used here, this YFP reporter is integrated into the genome under the control of a  
98 promoter containing four repeats of the heat shock *cis*-element (4xHSE) recognized by Hsf1  
99 (Zheng et al., 2016).

100

101 To test the model, we severed the feedback loop, both computationally and experimentally, and  
102 monitored Hsf1 activity over time following a shift from 25°C to 39°C by simulating and  
103 measuring the HSE-YFP reporter. We cut the feedback loop in the mathematical model by  
104 removing the equation relating the production of Hsp70 to the concentration of free Hsf1 without  
105 changing any parameters or initial conditions. In the absence of Hsf1-dependent transcription of  
106 Hsp70, the model predicted that the HSE-YFP reporter should be activated with the same  
107 kinetics as that of the wild type, but should continue to accumulate long after the response is  
108 attenuated in the wild type (Figure 1B).

109

110 To experimentally test this in yeast cells, we decoupled expression of all four cytosolic Hsp70  
111 paralogs (*SSA1/2/3/4*) from Hsf1 regulation while maintaining the expression of total Hsp70 at  
112 its endogenous levels under non-heat shock conditions. This was achieved by integrating two  
113 copies of *SSA2* under the control of the Hsf1-independent *TEF1* promoter into the genome and

114 deleting *ssa1/2/3/4*. We named this strain  $\Delta$ FBL to denote that we had removed the feedback  
115 loop (Figure 1A). As expected, wild type cells were able to increase Hsp70 levels and induce  
116 the HSE-YFP reporter protein during heat shock, while  $\Delta$ FBL cells were only able to induce the  
117 HSE-YFP protein – but not Hsp70 – during heat shock (Figure 1C). We performed a heat shock  
118 time course in WT and  $\Delta$ FBL cells and compared the expression of the HSE-YFP reporter by  
119 flow cytometry. As predicted by the simulation, the  $\Delta$ FBL strain activated the reporter with  
120 identical kinetics to the wild type during the early phase of the response, but failed to attenuate  
121 induction during prolonged exposure to elevated temperature (Figure 1B). While the simulation  
122 correctly predicted the experimental results qualitatively, the model underestimated the amount  
123 of time required to observe the separation between the wild type and  $\Delta$ FBL strains, suggesting  
124 the strength of the feedback had been exaggerated in the first iteration of the model. By  
125 reducing the strength of the feedback loop, we were able to quantitatively match the behavior of  
126 both the wild type and  $\Delta$ FBL cells (Figure 1B, see methods for updated parameter values).

127  
128 The inability of Hsf1 to deactivate in the  $\Delta$ FBL strain could result either from a specific disruption  
129 of the “OFF switch” or from a general failure of the cells to restore proteostasis. In other words,  
130 does cutting the feedback loop simply result in sustained stress, or is the prolonged Hsf1 activity  
131 the result of specifically breaking its deactivation mechanism? To distinguish these possibilities,  
132 we first compared growth of wild type,  $\Delta$ FBL and *ssa1/2* $\Delta$  cells at 30°C and 37°C. The *ssa1/2* $\Delta$   
133 cells – which retain viability due to Hsf1-mediated induction of *SSA3/4* – displayed severely  
134 impaired growth at 30°C and were inviable at 37°C (Figure 1D). By contrast, the wild type and  
135  $\Delta$ FBL strains grew equally at 30°C, and the  $\Delta$ FBL strain showed only a slight reduction in growth  
136 at 37°C (Figure 1C). The reduced growth of the  $\Delta$ FBL mutant at 37°C could be a consequence  
137 of either an inadequate or overzealous heat shock response, and does not necessarily indicate  
138 a general failure to restore proteostasis. To directly monitor the loss and restoration of  
139 proteostasis, we imaged wild type and  $\Delta$ FBL cells expressing Hsp104-mKate over a heat shock

140 time course. Hsp104 is a disaggregase that forms puncta marking protein aggregates when  
141 tagged with a fluorescent protein. Upon acute heat shock, the number of Hsp104-mKate foci  
142 spiked in both wild type and  $\Delta$ FBL cells, but dissolved with the same kinetics in both strains  
143 (Figure 1E, F). These data indicate that the  $\Delta$ FBL cells can restore proteostasis just as  
144 efficiently as wild type cells, and suggest that the prolonged Hsf1 activation in the  $\Delta$ FBL cells is  
145 due to a deactivation defect. Thus, the transcriptional negative feedback loop is required to  
146 deactivate Hsf1 once proteostasis has been restored.

147

### 148 **Scanning mutagenesis reveals three independent repressive segments in Hsf1**

149 In addition to positioning the transcriptional feedback loop as the core regulatory circuit that  
150 controls Hsf1 activity, the model also posits that Hsp70 binding is the mechanism that represses  
151 Hsf1. If this assumption is true, then disrupting the binding interaction should increase Hsf1  
152 activity under non-heat shock conditions (Figure 2 – figure supplement 1). To test this, we  
153 generated a series of 48 Hsf1 mutants in which we systematically removed 12 amino acid  
154 segments along the nonessential N- and C-terminal regions of Hsf1 (Figure 2A). We integrated  
155 these mutants into the genome as the only copy of *HSF1* in a strain background bearing the  
156 HSE-YFP reporter and assayed for activity by measuring YFP levels under non-heat shock and  
157 heat shock conditions by flow cytometry (Zheng et al., 2016). To benchmark the assays, we  
158 used wild type Hsf1 and mutants lacking the entire N- and C-terminal regions. As previously  
159 shown, removal of the N-terminal region led to significantly increased Hsf1 activity under both  
160 non-heat shock and heat shock conditions in this assay (Sorger, 1990; Zheng et al., 2016),  
161 while removal of the C-terminal region significantly reduced Hsf1 activity under both conditions  
162 (Figure 2A). In the N-terminal region, we found two distinct 12 amino acid segments that when  
163 deleted resulted in increased Hsf1 activity (amino acids 85-96 and 121-132) (Figure 2A). In the  
164 C-terminal region, removal of two consecutive 12 amino acid segments as well as truncation of

165 the final 6 amino acids resulted in increased Hsf1 activity (amino acids 528-539, 540-551 and  
166 828-833) (Figure 2A).

167  
168 To determine if these segments acted independently, we generated double mutants. Combining  
169 the N-terminal deletions ( $\Delta 85-96/\Delta 121-132$ ) resulted in a mutant with significantly greater basal  
170 activity than either of the single mutants, suggesting that these segments operate independently  
171 to repress Hsf1 activity ( $p < 0.05$ , Figure 2B). We will refer to these N-terminal segments as N1  
172 and N2. By contrast, combining the consecutive C-terminal segments ( $\Delta 528-539/\Delta 540-551$ )  
173 resulted in a double mutant with the same activity as the single deletions, suggesting that a  
174 unique functional determinant encompasses these segments (Figure 2B). Consistent with this  
175 notion, a region spanning these two segments comprises a previously identified element  
176 conserved in Hsf1 in other fungal species known as the “conserved element 2” (CE2) (Figure  
177 2B) (Jakobsen and Pelham, 1991). Indeed, specific removal of CE2 was sufficient to match the  
178 increased level of Hsf1 activity observed in the  $\Delta 528-539/\Delta 540-551$  mutant (Figure 2B).  
179 Additional removal of the final 6 amino acids provided no further increase in Hsf1 activity,  
180 consistent with previous studies suggesting a non-additive interaction between these elements  
181 (Figure 2B) (Hashikawa and Sakurai, 2004; Yamamoto et al., 2007). However, combining the  
182 N1/N2 and CE2 deletions resulted in an Hsf1 mutant with significantly greater activity than either  
183 the  $\Delta N1/\Delta N2$  mutant or the  $\Delta CE2$  mutant (Figure 2B). Together, the scanning mutagenesis  
184 revealed three independent repressive segments on Hsf1 (N1, N2, and CE2).

185  
186 **N1/N2 regulate DNA binding while CE2 regulates transactivation**

187 The segments we identified with increased HSE-YFP levels could function either by enhancing  
188 the association of Hsf1 with HSEs (i.e., increasing DNA binding) or by boosting the  
189 transactivation capacity of Hsf1 (i.e., increasing recruitment of the transcriptional machinery). To  
190 directly test the ability to bind to HSEs in cells, we performed chromatin immunoprecipitation



191 (ChIP) of wild type Hsf1, Hsf1<sup>ΔN</sup>, Hsf1<sup>ΔC</sup>, Hsf1<sup>ΔN1/ΔN2</sup>, Hsf1<sup>ΔCE2</sup> and Hsf1<sup>ΔN1/ΔN2/ΔCE2</sup> under non-  
192 heat shock and acute (5 minute) heat shock conditions. Following ChIP enrichment, we assayed  
193 for association with the synthetic *4xHSE* promoter that drives the YFP reporter as well as five  
194 endogenous target gene promoters (*HSC82*, *HSP82*, *SSA4*, *HSP26* and *TMA10*) by qPCR.  
195 Under non-heat shock conditions, wild type Hsf1 binding ranged over nearly two orders of  
196 magnitude across these targets, from 0.14% of input at the *TMA10* promoter to 12.0% of input  
197 at the *4xHSE* promoter (Figure 3—figure supplement 1). Upon acute heat shock, the inducibility  
198 of Hsf1 binding also varied widely across these targets, with induction of greater than 100-fold  
199 for *TMA10* and less than 1.5-fold for *HSC82* (Figure 3—figure supplement 1). These data are  
200 inconsistent with the notion that Hsf1 is constitutively bound to its target genes (Jakobsen and  
201 Pelham, 1988; Sorger et al., 1987).

202  
203 Interestingly, both the Hsf1<sup>ΔN</sup> and Hsf1<sup>ΔC</sup> mutants showed significantly increased association  
204 with the *4xHSE* and *SSA4* promoters under non-heat shock conditions (Figure 3A, Figure 3—  
205 figure supplement 1). However, while increased binding to the *4xHSE* promoter was  
206 accompanied by increased transcriptional output of the YFP reporter in Hsf1<sup>ΔN</sup> cells, no such  
207 increase in HSE-YFP levels was observed in Hsf1<sup>ΔC</sup> cells (Figure 3B). In fact, Hsf1<sup>ΔC</sup> cells  
208 showed significantly reduced HSE-YFP levels under non-heat shock conditions compared to  
209 wild type (Figure 2A). These data suggest a simple relationship between DNA binding and  
210 transcription for the Hsf1<sup>ΔN</sup> mutant: the N-terminal region of Hsf1 inhibits DNA binding and  
211 thereby reduces transcriptional activity. By contrast, there is no correlation between DNA  
212 binding and transcription for the Hsf1<sup>ΔC</sup> mutant.

213  
214 Consistent with a role for the N-terminal segment in regulating DNA binding, the Hsf1<sup>ΔN1/ΔN2</sup>  
215 mutant mirrored Hsf1<sup>ΔN</sup> in both its increased binding to the *4xHSE* promoter and increased  
216 transcription of the YFP reporter under non-heat shock conditions relative to wild type (Figure

217 3A, B). However, unlike the complete ablation of the N-terminal region, Hsf1<sup>ΔN1/ΔN2</sup> showed no  
218 increase in association with the *SSA4* promoter compared to wild type (Figure 3—figure  
219 supplement 1), suggesting that its enhanced association with endogenous targets may be  
220 limited. Neither Hsf1<sup>ΔCE2</sup> nor Hsf1<sup>ΔN1/ΔN2/ΔCE2</sup> showed any significant differences compared to wild  
221 type at any of the six target promoters under either non-heat shock or heat shock conditions,  
222 indicating that CE2 has no effect on Hsf1 DNA binding (Figure 3—figure supplement 1).  
223 Remarkably, under heat shock conditions, none of the five mutants showed significant  
224 differences in binding to the *4xHSE* promoter compared to wild type (Figure 3A). Thus, during  
225 heat shock, the differences in YFP reporter levels reflect the different transactivation abilities of  
226 the series of mutants, spanning more than 16-fold between Hsf1<sup>ΔC</sup> and Hsf1<sup>ΔN1/ΔN2/ΔCE2</sup> (Figure  
227 3B). Taken together, the ChIP results suggest that multiple determinants, including the N1/N2  
228 segments and the C-terminal domain, contribute to regulating DNA binding.

229

### 230 **CE2 is a direct binding site for Hsp70**

231 Since CE2 affects Hsf1 transactivation but not DNA binding, we hypothesized that it could be a  
232 binding site for Hsp70. To test this, we performed serial immunoprecipitation from whole cell  
233 lysates followed by mass spectrometry (IP/MS) of 3xFLAG/V5-tagged Hsf1 mutants to identify  
234 specific interactions with chaperone proteins. We measured Hsp70 binding to wild type Hsf1,  
235 Hsf1<sup>ΔN</sup>, Hsf1<sup>ΔC</sup>, Hsf1<sup>ΔN1/ΔN2</sup>, Hsf1<sup>ΔCE2</sup> and Hsf1<sup>ΔN1/ΔN2/ΔCE2</sup> under non-heat shock conditions,  
236 performing three biological replicates for each. Removal of the entire N-terminal region or the  
237 N1/N2 segments had no effect on Hsp70 binding relative to wild type, consistent with a role  
238 confined to regulating DNA binding (Figure 4A). By contrast, removal of the full C-terminal  
239 region significantly reduced the association of Hsf1 with Hsp70 (Figure 4A). Moreover, specific  
240 removal of CE2 – either alone or in combination with the N1/N2 deletions – also resulted in  
241 significantly diminished association with Hsp70, nearly matching removal of the entire C-  
242 terminal region (Figure 4A). Analysis of an additional biological replicate by Western blotting

243 corroborated the IP/MS results (Figure 4A). The residual Hsp70 that co-precipitated with  
244 Hsf1<sup>ΔCE2</sup> was refractory to dissociation upon heat shock, suggesting that this secondary  
245 interaction is unlikely to be regulatory (Figure 4B).

246  
247 Simulations of heat shock time courses as a function of decreased affinity between Hsf1 and  
248 Hsp70 predicted progressively increased levels of the HSE-YFP under non-heat shock  
249 conditions and prolonged activation following heat shock relative to wild type (Figure 4—figure  
250 supplement 1A). In agreement, Hsf1<sup>ΔCE2</sup> has elevated HSE-YFP levels under non-heat shock  
251 conditions and displayed delayed deactivation kinetics compared to wild type in a heat shock  
252 time course (Figure 4—figure supplement 1B).

253  
254 Finally, to test a direct role for CE2 in binding to Hsp70, we utilized an in vitro binding assay we  
255 previously established to monitor interaction between recombinant purified Hsf1 and Hsp70  
256 (Zheng et al., 2016). Whereas wild type Hsf1-6xHIS was able to outcompete wild type Hsf1-V5  
257 for binding to the Hsp70 Ssa2 at a 5-fold molar excess, Hsf1<sup>ΔCE2</sup>-6xHIS was not (Figure 4C).  
258 These results demonstrate that CE2 is a direct binding site for Hsp70 through which Hsp70  
259 represses Hsf1.

260

## 261 **DISCUSSION**

262 In this study we tested the assumptions of our mathematical model of the heat shock response  
263 by severing the Hsp70 transcriptional feedback loop and mapping an Hsp70 binding site on  
264 Hsf1. While we uncovered more biological complexity in Hsf1 regulation than we represent in  
265 the model, we validated the model's central tenets – that Hsp70 binding and dissociation turn  
266 Hsf1 off and on, and that transcriptional induction of Hsp70 represents a critical negative  
267 feedback loop required for the homeostatic regulation of Hsf1. Moreover, we found the model to  
268 be remarkably powerful in its ability to predict the dynamics of Hsf1 activity when challenged

269 with targeted perturbations to the system architecture despite its oversimplified structure. These  
270 results argue that conceptualizing the heat shock response as a two-component feedback loop  
271 – in which Hsf1 positively regulates Hsp70 expression and Hsp70 negatively regulates Hsf1  
272 activity – is an appropriate abstraction that captures the essence of the regulatory network.  
273 Whether this simplifying abstraction can be applied to HSF1 regulation in metazoans remains to  
274 be determined.

275  
276 At a more mechanistic level, our screen for functional determinants in the N- and C-terminal  
277 regions of Hsf1 revealed three distinct segments in Hsf1 that independently exert negative  
278 regulation. The two N-terminal segments contribute to hitherto unknown repression of Hsf1 DNA  
279 binding, while the single C-terminal segment, CE2, is a binding site for Hsp70 through which  
280 Hsp70 represses Hsf1 transactivation. Although, as its name suggests, CE2 is conserved, it is  
281 restricted to a subset of yeast species and is absent in mammalian HSF1 sequences. Its amino  
282 acid composition, consisting of hydrophobic and basic residues, is reminiscent of peptide  
283 sequences known to bind to Hsp70 *in vitro* (Van Durme et al., 2009), lending additional  
284 credence to our results. Thus, while CE2 is not conserved in mammalian genomes in primary  
285 sequence, it would seem facile to evolve a distinct but functionally analogous hydrophobic and  
286 basic segment to allow for Hsp70 binding. Notably, even though we found no evidence that the  
287 N1 segment is an additional Hsp70 binding site on endogenous Hsf1, its sequence is also  
288 predicted to be an Hsp70 binding site and is capable of binding to Hsp70 when overexpressed  
289 *in trans* (S. Peffer and K. Morano, personal communication).

290  
291 In addition to mechanistic insight into Hsp70 binding, our results for the first time reveal the  
292 existence of intramolecular determinants that negatively regulate Hsf1 DNA binding. While it has  
293 been known for many years that removal of the N-terminal region of Hsf1 leads to increased  
294 activity (Sorger, 1990) – suggesting that this region is repressive in nature – the N-terminus also

295 has a transactivation function and is important for efficient recruitment of Mediator during heat  
296 shock (Kim and Gross, 2013). Here we show that removal of the full N-terminal region results in  
297 increased association with target gene promoters under non-heat shock conditions (Figure 3A),  
298 indicating a role for this yeast-specific region in impeding DNA binding and suggesting a  
299 mechanistic basis for the increased transcriptional activity of Hsf1<sup>ΔN</sup> relative to wild type Hsf1. In  
300 particular, the N1/N2 segments contribute to blocking DNA binding, as Hsf1<sup>ΔN/ΔN2</sup> displayed  
301 increased association with the synthetic *4xHSE* promoter (Figure 3A). If N1 were a bona fide  
302 second Hsp70 binding site (Peffer and Morano, personal communication), then Hsp70 would be  
303 likely to regulate both Hsf1 DNA binding and transactivation. Alternatively, if the N1/N2  
304 segments impede DNA binding independent of Hsp70, then an additional heat shock-dependent  
305 mechanism would be required to relieve this block. Perhaps, by analogy to the intrinsic ability of  
306 human HSF1 to trimerize and bind DNA at elevated temperature (Hentze et al., 2016), the  
307 N1/N2 segments could contribute to direct thermosensing by mediating a temperature-  
308 dependent conformational change that increases DNA binding ability. The role of the C-terminus  
309 in regulating Hsf1 DNA binding is less clear, given that we observed increased association with  
310 the *4xHSE* promoter yet diminished HSE-YFP levels. There could be an element in the C-  
311 terminus that inhibits Hsf1 DNA binding. Alternatively, the increased DNA association observed  
312 for Hsf1<sup>ΔC</sup> could be a consequence of its severely impaired transactivation ability: If each  
313 binding event is less likely to lead to productive transcription, then the cell must force Hsf1<sup>ΔC</sup> to  
314 compensate to achieve sufficient transcription of the essential Hsf1 regulon; thus, Hsf1<sup>ΔC</sup> must  
315 engage in more binding events to sustain growth. Moreover, since Hsf1<sup>ΔC</sup> has to use its N-  
316 terminal region as a transactivator, the N-terminus may be unavailable to impede DNA binding.  
317  
318 Putting all of these observations together, we propose that Hsf1 can exist in one of four states in  
319 the yeast nucleus (Figure 4D):

320 1) *C-terminal activation domain (CTA) closed/DBD unbound*

321 Hsp70 is bound to CE2 keeping the CTA closed; the N-terminal region is engaged in  
322 blocking the DBD from accessing available HSEs via the N1/N2 segments.

323 *2) CTA open/DBD unbound*

324 Hsp70 has dissociated from CE2; the CTA is open and can potentially recruit the  
325 transcriptional machinery; the N-terminal region continues to hinder DNA binding.

326 *3) CTA closed/DBD bound*

327 Hsp70 remains bound to CE2 keeping the CTA closed; the N-terminal region has  
328 reoriented to allow HSE binding; Hsf1 weakly recruits the transcriptional machinery.

329 *4) CTA open/DBD bound*

330 Hsp70 has dissociated from CE2 and the CTA is open; the N-terminal region has  
331 reoriented to allow HSE binding; Hsf1 avidly recruits the transcriptional machinery.

332

333 The dual mechanisms of Hsf1 regulation described here – control of DNA binding and  
334 accessibility of the transactivation domain – in combination with the fine-tuning capacity we  
335 previously demonstrated for phosphorylation (Zheng et al., 2016), exert exquisite quantitative  
336 control over the Hsf1 regulon. We propose that these three regulatory mechanisms enable cells  
337 to precisely tailor an optimal response to a variety of environmental and internal stresses.

338

339 **FIGURE LEGENDS**

340 **Figure 1. Transcriptional induction of Hsp70 during heat shock is required for Hsf1**  
341 **deactivation but not proteostasis.**

342 **A)** Schematic of the Hsf1 regulatory circuit described by the mathematical model. To generate  
343 the feedback-severed yeast strain ( $\Delta$ FBL), all four Hsp70 paralogs (*SSA1/2/3/4*) were deleted  
344 from the genome and 2 copies of *SSA2* under the control of the Hsf1-independent TEF1  
345 promoter were integrated to achieve comparable Hsp70 expression under basal conditions.

346 **B)** Simulated and experimental heat shock time courses comparing the HSE-YFP reporter in  
347 wild type and  $\Delta$ FBL cells. The experimental points represent the average of the median HSE-  
348 YFP level in three biological replicates, and the error bars are the standard deviation of the  
349 replicates.

350 **C)** Western blot of the expression of Hsp70 (*Ssa1/2*), the HSE-YFP reporter and glycolytic  
351 enzyme P<sub>gk1</sub> in wild type and  $\Delta$ FBL cells under non-heat shock and heat shock conditions. The  
352 dashed lines indicate where lanes were cropped for organization.

353 **D)** Dilution series spot assay of wild type, *ssa1/2* $\Delta$  and  $\Delta$ FBL cells grown at 30°C and 30°C for  
354 36 hours.

355 **E)** Wild type and  $\Delta$ FBL cells expressing the Hsp104-mKate aggregation reporter along with the  
356 HSE-YFP imaged over a heat shock time course showing transient accumulation of Hsp104 foci  
357 and sustained induction of HSE-YFP levels in the  $\Delta$ FBL cells.

358 **F)** Quantification of the number of Hsp104-mKate foci in wild type and  $\Delta$ FBL cells over a heat  
359 shock time course. N > 100 cells for each time point. Error bars represent the standard error of  
360 the mean.

361

362 **Figure 2. Identification of negative regulatory determinants in the N- and C-termini of**  
363 **Hsf1.**

364 **A)** Screen for functional determinants. The indicated Hsf1 mutants were integrated into the  
365 genome as the only copy of Hsf1 expressed from the endogenous *HSF1* promoter in a strain  
366 expressing the HSE-YFP reporter. Hsf1 $\Delta$ N is a deletion of the first 145 amino acids following the  
367 methionine; Hsf1 $\Delta$ C is a truncation of the last 409 amino acids of Hsf1, retaining the first 424  
368 amino acids. Each mutant in the scanning deletion analysis is missing a stretch of 12 amino  
369 acids in either the N-terminal 149 residues or final 414 C-terminal residues. Each strain was  
370 assayed in triplicate for its HSE-YFP level under non-heat shock (NHS) and heat shock (HS)  
371 conditions by flow cytometry. The error bars are the standard deviation of the replicates.  
372 Statistical significance was determined by a two-tailed T-test (\*  $p < 0.05$ ; \*\*  $p < 0.01$ ).

373 **B)** Analysis of double and triple mutants of the functional segments.  $\Delta$ N1 and  $\Delta$ N2 represent  
374  $\Delta$ 85-96 and  $\Delta$ 121-132, respectively, and each independently contribute to Hsf1 activity. CE2 is a  
375 region spanning the consecutive C-terminal determinants defined in (A) that is conserved  
376 among a subset of fungal species. Statistical significance was determined by two-tailed T-tests  
377 comparing each double mutants to both of the single mutant parents (\*  $p < 0.05$  for both T-  
378 tests).

379 **Figure 2—figure supplement 1. Simulation showing an increase in the basal level**  
380 **of the HSE-YFP reporter as a function of increased dissociation rate (decreased**  
381 **affinity) of the Hsp70•Hsf1 interaction.** The “wild type” rate is  $2.783 \text{ min}^{-1}$  as in the  
382 previous iteration of the model (not shown on the graph) (Zheng et al., 2016).

383

384 **Figure 3. The Hsf1 N-terminus regulates DNA binding while CE2 controls transactivation.**

385 **A)** Chromatin immunoprecipitation of Hsf1 followed by quantitative PCR of the *4xHSE* promoter  
386 in the indicated Hsf1 wild type and mutant strains under non-heat shock and heat shock  
387 conditions (solid and outlined bars, respectively). Error bars show the standard deviation of  
388 biological replicates. Statistical significance was determined by a two-tailed T-test (\*  $p < 0.05$ ; \*\*  
389  $p < 0.01$ ).



390 **B)** Relationship between Hsf1 binding at the 4xHSE promoter as determined by ChIP-qPCR  
391 and transcriptional activity as measured by levels of the HSE-YFP reporter under non-heat  
392 shock (NHS) and heat shock (HS) conditions for the panel of mutants assayed in (A).

393

394 **Figure 3—figure supplement 1. ChIP-qPCR of Hsf1 mutants at endogenous target**  
395 **promoters under non-heat shock and heat shock conditions.** Error bars show the  
396 standard deviation of biological replicates. Statistical significance was determined by a  
397 two-tailed T-test (\*  $p < 0.05$ ; \*\*  $p < 0.01$ ).

398

399 **Figure 4. CE2 is a direct Hsp70 binding site.**

400 **A)** Co-immunoprecipitation of Hsf1 and Hsp70. The indicated Hsf1 mutants, C-terminally tagged  
401 with 3xFLAG-V5, were serially precipitated and subjected to mass spectrometry as described.  
402 The ratio of Hsp70 (Ssa1/2) to Hsf1 was determined in three three biological replicates (bar  
403 graph, error bars are the standard deviation). Statistical significance was determined by a two-  
404 tailed T-test (\*  $p < 0.05$ ; \*\*  $p < 0.01$ ). An additional replicate was analyzed by Western blot  
405 using antibodies against Ssa1/2 and the FLAG tag to recognize Hsf1. The FLAG blot was  
406 cropped in the middle to show the much smaller Hsf1<sup>ΔC</sup>.

407 **B)** Cells expressing C-terminally 3xFLAG-V5-tagged wild type Hsf1 and Hsf1<sup>ΔCE2</sup> were either left  
408 untreated or heat shocked for 5 minutes at 39°C before serial Hsf1 immunoprecipitation and  
409 analyzed by Western blot using antibodies against Ssa1/2 and the FLAG tag to recognize Hsf1.

410 **C)** In vitro Hsf1:Hsp70 binding assay. Recombinant Hsf1-V5 and 3xFLAG-Ssa2 were purified,  
411 incubated together and assayed for binding by anti-FLAG immunoprecipitation followed by  
412 epitope-tag-specific Western blot. Addition of 5-fold molar excess of wild type Hsf1-6xHIS but  
413 not Hsf1<sup>ΔCE2</sup>-6xHIS diminished the amount of Hsf1-V5 bound to 3xFLAG-Ssa2.

414 **D)** Thermodynamic representation of the 4 state model of Hsf1 activity.

415

416 **Figure 4—figure supplement 1. Reduced affinity for Hsp70 results in increased**

417 **basal Hsf1 activity and delayed deactivation kinetics during heat shock.**

418 **A)** Simulations of HSE-YFP levels over a heat shock time course as a function of

419 increased rate of dissociation (reduced affinity) of Hsp70 from Hsf1.

420 **B)** Experimental heat shock time course of HSE-YFP levels in cells expressing wild type

421 Hsf1 or Hsf1<sup>ΔCE2</sup>. Each point represents the average of the median HSE-YFP level in

422 three biological replicates, and the error bars are the standard deviation of the replicates.

423

424 **ACKNOWLEDGEMENTS**

425 We are grateful A. Kane for providing us with the phleomycin resistance cassette and deleting  
426 SSA3, to A. Jaeger for beneficial discussions, and to H. Lodish, G. Fink and their lab members  
427 for insightful comments. Experimentally, we are indebted to E. Spooner and the Whitehead  
428 Proteomics core for mass spectrometric analysis, to the Whitehead Institute FACS facility for  
429 technical assistance and to N. Azubuine and T. Nanchung for a constant supply of plates and  
430 media. This work was supported by an NIH Early Independence Award (DP5 OD017941-01 to  
431 D.P.), a National Science Foundation CAREER Award (MCB-1350949 to A.S.K.) and a National  
432 Science Foundation grant (MCB-1518345 to D.S.G.).

433

434 **AUTHOR CONTRIBUTIONS**

435 Conceptualization, D.P. and A.S.K; Methodology, J.K., X.Z., N.P., K.V., A.J. and D.P.;  
436 Investigation, J.K., X.Z., N.P., A.J., K.V., and D.P.; Writing, D.P., D.S.G. and A.S.K.; Funding  
437 Acquisition, D.P., A.S.K. and D.S.G.; Supervision, D.P., A.S.K. and D.S.G.

438

439 **METHODS**

440 **Yeast strains, plasmids and cell growth**

441 Yeast cells were cultured in SDC media and dilution series spot assays were performed as  
442 described. Strains and plasmids are listed in Supplementary Tables 1 and 2.

443

444 **Mathematical modeling**

445 Modeling was performed as described (Zheng et al., 2016).

446 Model parameter:

| <i>Parameter</i> | <i>Previous Paper model values</i>         | <i>This paper's model values</i>           |
|------------------|--------------------------------------------|--------------------------------------------|
| $k_1, k_3$       | $166.8 \text{ min}^{-1} \text{ a.u.}^{-1}$ | $166.8 \text{ min}^{-1} \text{ a.u.}^{-1}$ |
| $k_2$            | $2.783 \text{ min}^{-1}$                   | $2.783 \text{ min}^{-1}$                   |
| $k_4$            | $0.0464 \text{ min}^{-1}$                  | $0.0464 \text{ min}^{-1}$                  |

| <i>Parameter</i>  | <i>Previous Paper model values</i> | <i>This paper's model values</i> |
|-------------------|------------------------------------|----------------------------------|
| $k_5$             | 4.64e-7 min <sup>-1</sup>          | 4.64e-7 min <sup>-1</sup>        |
| $\beta$           | 1.778 min <sup>-1</sup>            | 0.3557 min <sup>-1</sup>         |
| $K_d$             | 0.0022 a.u.                        | 0.0022 a.u.                      |
| $k_{dil}$ (fixed) | 0 min <sup>-1</sup>                | 0 min <sup>-1</sup>              |
| $n$ (fixed)       | 3                                  | 3                                |

447

448 Initial conditions:

| <i>Species</i>             | <i>Initial value (a.u.)</i> | <i>Description</i>        |
|----------------------------|-----------------------------|---------------------------|
| [HSP] <sub>o</sub>         | 1                           | Free Hsp70                |
| [Hsf1] <sub>o</sub>        | 0                           | Free Hsf1                 |
| [HSP•Hsf1] <sub>o</sub>    | 0.002                       | HSP70•Hsf1 complex        |
| [HSP•UP] <sub>o</sub>      | 0                           | Hsp70•UP complex          |
| [YFP] <sub>o</sub>         | 3                           | Initial YFP concentration |
| [UP] <sub>o</sub> (@ 39°C) | 10.51                       | UP concentration at 39°C  |

449

#### 450 **Flow cytometry**

451 Heat shock experiments and heat shock time courses were performed and HSE-YFP levels  
452 were quantified by flow cytometry as described (Zheng et al., 2016). Data were processed in  
453 FlowJo 10. Data were left ungated and YFP fluorescence was normalized by side scatter (SSC)  
454 for each cell.

455

#### 456 **Spinning disc confocal imaging**

457 Imaging was performed as described (Zheng et al., 2016). Hsp104-mKate foci were quantified  
458 manually in ImageJ.

459

#### 460 **Chromatin Immunoprecipitation (ChIP)**

461 Hsf1 ChIP was performed and quantified by qPCR as described (Anandhakumar et al., 2016).

462

#### 463 **Serial 3xFLAG/V5 immunoprecipitation**

464 Hsf1-3xFLAG-V5 was serially immunoprecipitated and analyzed by mass spectrometry and  
465 Western blotting as described (Zheng et al., 2016; Zheng and Pincus, 2017).

466 **Recombinant protein binding and competition assay**

467 In vitro binding assay between Hsf1 and Ssa2 was performed as described (Zheng et al., 2016).

468

469 **REFERENCES**

470 Anandhakumar, J., Moustafa, Y.W., Chowdhary, S., Kainth, A.S., and Gross, D.S. (2016).

471 Evidence for Multiple Mediator Complexes in Yeast Independently Recruited by Activated Heat  
472 Shock Factor. *Mol Cell Biol* 36, 1943-1960.

473 Anckar, J., and Sistonen, L. (2011). Regulation of HSF1 function in the heat stress response:  
474 implications in aging and disease. *Annu Rev Biochem* 80, 1089-1115.

475 Baler, R., Dahl, G., and Voellmy, R. (1993). Activation of human heat shock genes is  
476 accompanied by oligomerization, modification, and rapid translocation of heat shock  
477 transcription factor HSF1. *Mol Cell Biol* 13, 2486-2496.

478 Cotto, J.J., Kline, M., and Morimoto, R.I. (1996). Activation of heat shock factor 1 DNA binding  
479 precedes stress-induced serine phosphorylation. Evidence for a multistep pathway of regulation.  
480 *J Biol Chem* 271, 3355-3358.

481 Dai, C., Santagata, S., Tang, Z., Shi, J., Cao, J., Kwon, H., Bronson, R.T., Whitesell, L., and  
482 Lindquist, S. (2012). Loss of tumor suppressor NF1 activates HSF1 to promote carcinogenesis.  
483 *J Clin Invest* 122, 3742-3754.

484 Dai, C., Whitesell, L., Rogers, A.B., and Lindquist, S. (2007). Heat shock factor 1 is a powerful  
485 multifaceted modifier of carcinogenesis. *Cell* 130, 1005-1018.

486 Gomez-Pastor, R., Burchfiel, E.T., Neef, D.W., Jaeger, A.M., Cabisco, E., McKinstry, S.U.,  
487 Doss, A., Aballay, A., Lo, D.C., Akimov, S.S., *et al.* (2017). Abnormal degradation of the  
488 neuronal stress-protective transcription factor HSF1 in Huntington's disease. *Nat Commun* 8,  
489 14405.

- 490 Gross, D.S., English, K.E., Collins, K.W., and Lee, S.W. (1990). Genomic footprinting of the  
491 yeast HSP82 promoter reveals marked distortion of the DNA helix and constitutive occupancy of  
492 heat shock and TATA elements. *J Mol Biol* 216, 611-631.
- 493 Hashikawa, N., and Sakurai, H. (2004). Phosphorylation of the yeast heat shock transcription  
494 factor is implicated in gene-specific activation dependent on the architecture of the heat shock  
495 element. *Mol Cell Biol* 24, 3648-3659.
- 496 Hentze, N., Le Breton, L., Wiesner, J., Kempf, G., and Mayer, M.P. (2016). Molecular  
497 mechanism of thermosensory function of human heat shock transcription factor Hsf1. *Elife* 5.
- 498 Hietakangas, V., Ahlskog, J.K., Jakobsson, A.M., Hellesuo, M., Sahlberg, N.M., Holmberg, C.I.,  
499 Mikhailov, A., Palvimo, J.J., Pirkkala, L., and Sistonen, L. (2003). Phosphorylation of serine 303  
500 is a prerequisite for the stress-inducible SUMO modification of heat shock factor 1. *Mol Cell Biol*  
501 23, 2953-2968.
- 502 Holmberg, C.I., Hietakangas, V., Mikhailov, A., Rantanen, J.O., Kallio, M., Meinander, A.,  
503 Hellman, J., Morrice, N., MacKintosh, C., Morimoto, R.I., *et al.* (2001). Phosphorylation of serine  
504 230 promotes inducible transcriptional activity of heat shock factor 1. *EMBO J* 20, 3800-3810.
- 505 Jakobsen, B.K., and Pelham, H.R. (1988). Constitutive binding of yeast heat shock factor to  
506 DNA in vivo. *Mol Cell Biol* 8, 5040-5042.
- 507 Jakobsen, B.K., and Pelham, H.R. (1991). A conserved heptapeptide restrains the activity of the  
508 yeast heat shock transcription factor. *EMBO J* 10, 369-375.
- 509 Kim, S., and Gross, D.S. (2013). Mediator recruitment to heat shock genes requires dual Hsf1  
510 activation domains and mediator tail subunits Med15 and Med16. *J Biol Chem* 288, 12197-  
511 12213.
- 512 Kline, M.P., and Morimoto, R.I. (1997). Repression of the heat shock factor 1 transcriptional  
513 activation domain is modulated by constitutive phosphorylation. *Mol Cell Biol* 17, 2107-2115.
- 514 Mahat, D.B., Salamanca, H.H., Duarte, F.M., Danko, C.G., and Lis, J.T. (2016). Mammalian  
515 Heat Shock Response and Mechanisms Underlying Its Genome-wide Transcriptional  
516 Regulation. *Mol Cell* 62, 63-78.

- 517 McDaniel, D., Caplan, A.J., Lee, M.S., Adams, C.C., Fishel, B.R., Gross, D.S., and Garrard,  
518 W.T. (1989). Basal-level expression of the yeast HSP82 gene requires a heat shock regulatory  
519 element. *Mol Cell Biol* **9**, 4789-4798.
- 520 Mendillo, M.L., Santagata, S., Koeva, M., Bell, G.W., Hu, R., Tamimi, R.M., Fraenkel, E., Ince,  
521 T.A., Whitesell, L., and Lindquist, S. (2012). HSF1 drives a transcriptional program distinct from  
522 heat shock to support highly malignant human cancers. *Cell* **150**, 549-562.
- 523 Neef, D.W., Jaeger, A.M., Gomez-Pastor, R., Willmund, F., Frydman, J., and Thiele, D.J.  
524 (2014). A direct regulatory interaction between chaperonin TRiC and stress-responsive  
525 transcription factor HSF1. *Cell Rep* **9**, 955-966.
- 526 Neef, D.W., Jaeger, A.M., and Thiele, D.J. (2011). Heat shock transcription factor 1 as a  
527 therapeutic target in neurodegenerative diseases. *Nat Rev Drug Discov* **10**, 930-944.
- 528 Richter, K., Haslbeck, M., and Buchner, J. (2010). The heat shock response: life on the verge of  
529 death. *Mol Cell* **40**, 253-266.
- 530 Santagata, S., Hu, R., Lin, N.U., Mendillo, M.L., Collins, L.C., Hankinson, S.E., Schnitt, S.J.,  
531 Whitesell, L., Tamimi, R.M., Lindquist, S., *et al.* (2011). High levels of nuclear heat-shock factor  
532 1 (HSF1) are associated with poor prognosis in breast cancer. *Proc Natl Acad Sci U S A* **108**,  
533 18378-18383.
- 534 Scherz-Shouval, R., Santagata, S., Mendillo, M.L., Sholl, L.M., Ben-Aharon, I., Beck, A.H., Dias-  
535 Santagata, D., Koeva, M., Stemmer, S.M., Whitesell, L., *et al.* (2014). The reprogramming of  
536 tumor stroma by HSF1 is a potent enabler of malignancy. *Cell* **158**, 564-578.
- 537 Shamovsky, I., Ivannikov, M., Kandel, E.S., Gershon, D., and Nudler, E. (2006). RNA-mediated  
538 response to heat shock in mammalian cells. *Nature* **440**, 556-560.
- 539 Shi, Y., Mosser, D.D., and Morimoto, R.I. (1998). Molecular chaperones as HSF1-specific  
540 transcriptional repressors. *Genes Dev* **12**, 654-666.
- 541 Solis, E.J., Pandey, J.P., Zheng, X., Jin, D.X., Gupta, P.B., Airoidi, E.M., Pincus, D., and Denic,  
542 V. (2016). Defining the Essential Function of Yeast Hsf1 Reveals a Compact Transcriptional  
543 Program for Maintaining Eukaryotic Proteostasis. *Mol Cell* **63**, 60-71.

- 544 Sorger, P.K. (1990). Yeast heat shock factor contains separable transient and sustained  
545 response transcriptional activators. *Cell* 62, 793-805.
- 546 Sorger, P.K., Lewis, M.J., and Pelham, H.R. (1987). Heat shock factor is regulated differently in  
547 yeast and HeLa cells. *Nature* 329, 81-84.
- 548 Sorger, P.K., and Nelson, H.C. (1989). Trimerization of a yeast transcriptional activator via a  
549 coiled-coil motif. *Cell* 59, 807-813.
- 550 Van Durme, J., Maurer-Stroh, S., Gallardo, R., Wilkinson, H., Rousseau, F., and Schymkowitz,  
551 J. (2009). Accurate prediction of DnaK-peptide binding via homology modelling and  
552 experimental data. *PLoS Comput Biol* 5, e1000475.
- 553 Westerheide, S.D., Anckar, J., Stevens, S.M., Jr., Sistonen, L., and Morimoto, R.I. (2009).  
554 Stress-inducible regulation of heat shock factor 1 by the deacetylase SIRT1. *Science* 323, 1063-  
555 1066.
- 556 Xia, W., Guo, Y., Vilaboa, N., Zuo, J., and Voellmy, R. (1998). Transcriptional activation of heat  
557 shock factor HSF1 probed by phosphopeptide analysis of factor 32P-labeled in vivo. *J Biol*  
558 *Chem* 273, 8749-8755.
- 559 Xiao, H., Perisic, O., and Lis, J.T. (1991). Cooperative binding of *Drosophila* heat shock factor to  
560 arrays of a conserved 5 bp unit. *Cell* 64, 585-593.
- 561 Yamamoto, A., Ueda, J., Yamamoto, N., Hashikawa, N., and Sakurai, H. (2007). Role of heat  
562 shock transcription factor in *Saccharomyces cerevisiae* oxidative stress response. *Eukaryot Cell*  
563 6, 1373-1379.
- 564 Zheng, X., Krakowiak, J., Patel, N., Beyzavi, A., Ezike, J., Khalil, A.S., and Pincus, D. (2016).  
565 Dynamic control of Hsf1 during heat shock by a chaperone switch and phosphorylation. *Elife* 5.
- 566 Zheng, X., and Pincus, D. (2017). Serial Immunoprecipitation of 3xFLAG/V5-tagged Yeast  
567 Proteins to Identify Specific Interactions with Chaperone Proteins. *Bio-protocol* 7, e2348.
- 568 Zhong, M., Orosz, A., and Wu, C. (1998). Direct sensing of heat and oxidation by *Drosophila*  
569 heat shock transcription factor. *Mol Cell* 2, 101-108.



570 Zou, J., Guo, Y., Guettouche, T., Smith, D.F., and Voellmy, R. (1998). Repression of heat shock  
571 transcription factor HSF1 activation by HSP90 (HSP90 complex) that forms a stress-sensitive  
572 complex with HSF1. *Cell* 94, 471-480.  
573

# Figure 1

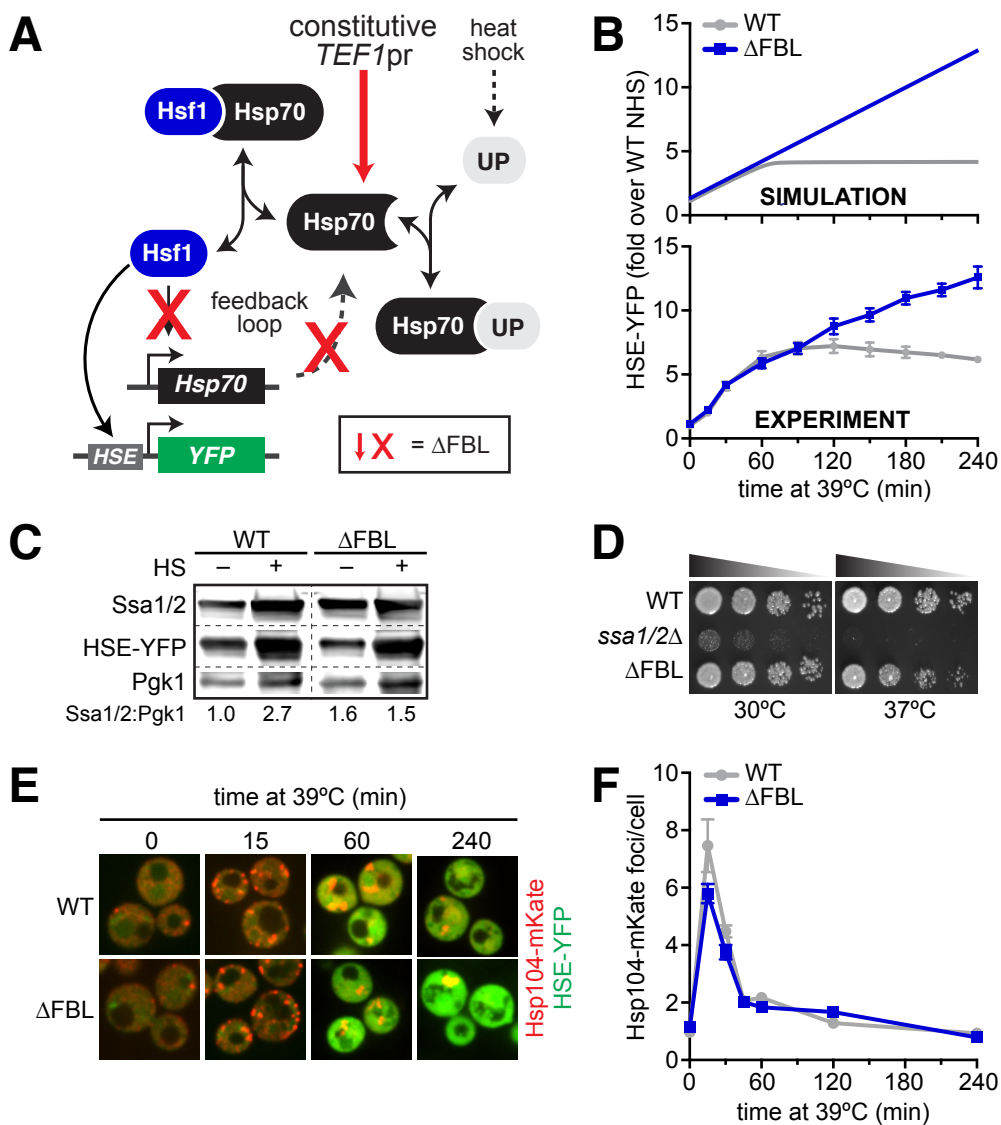

## Figure 2

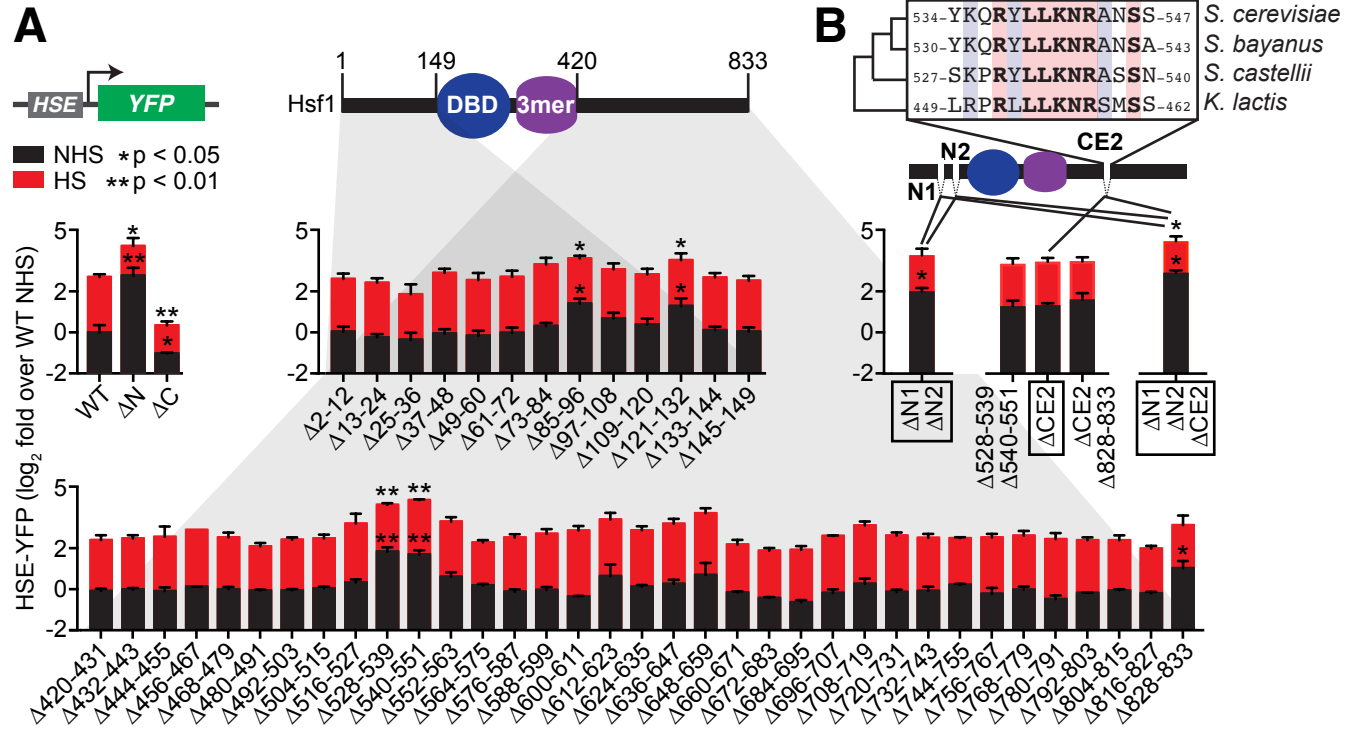

## Figure 3

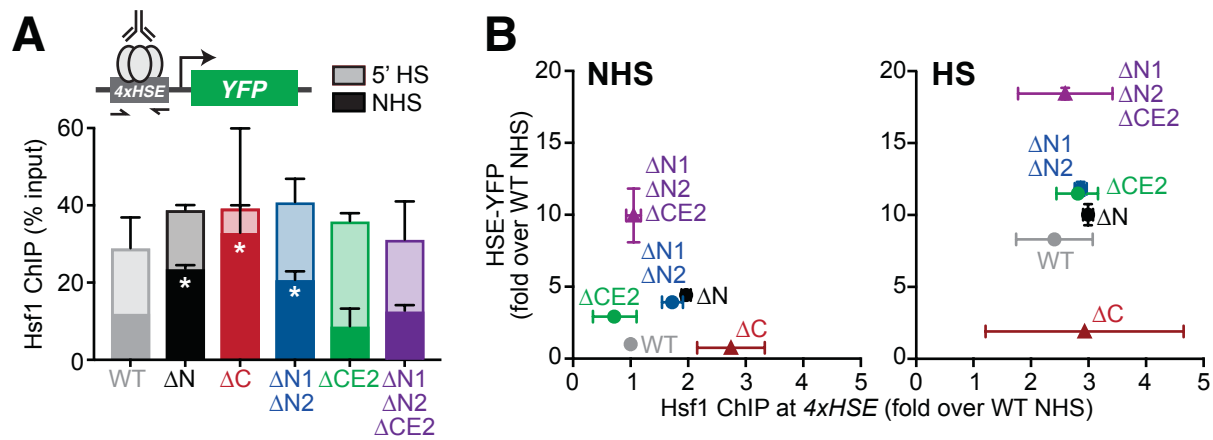

## Figure 4

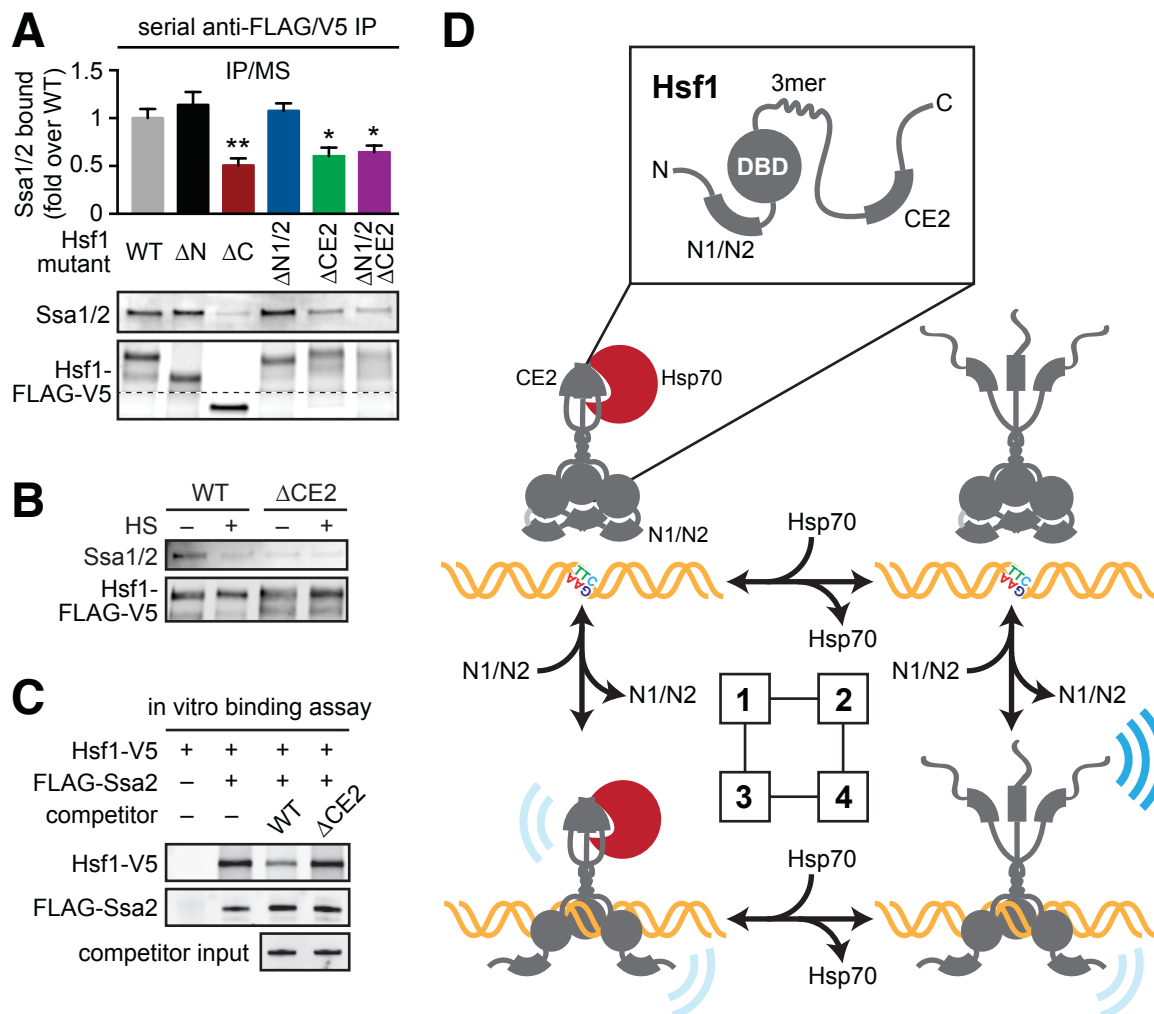

## Figure 2—figure supplement 1

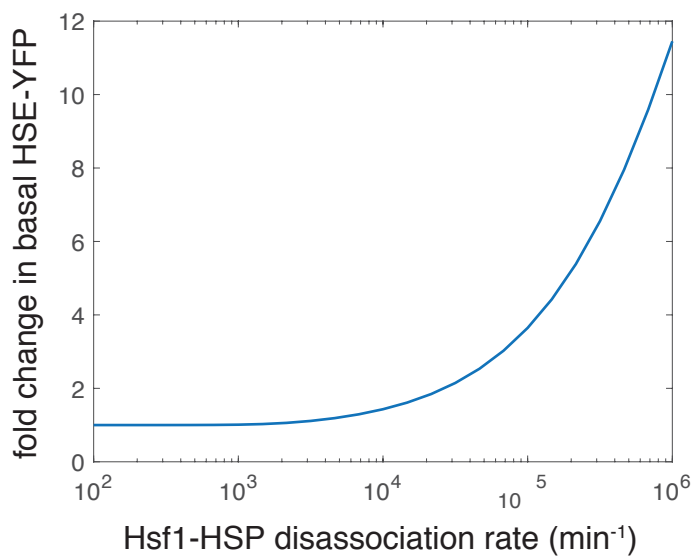

## Figure 3—figure supplement 1

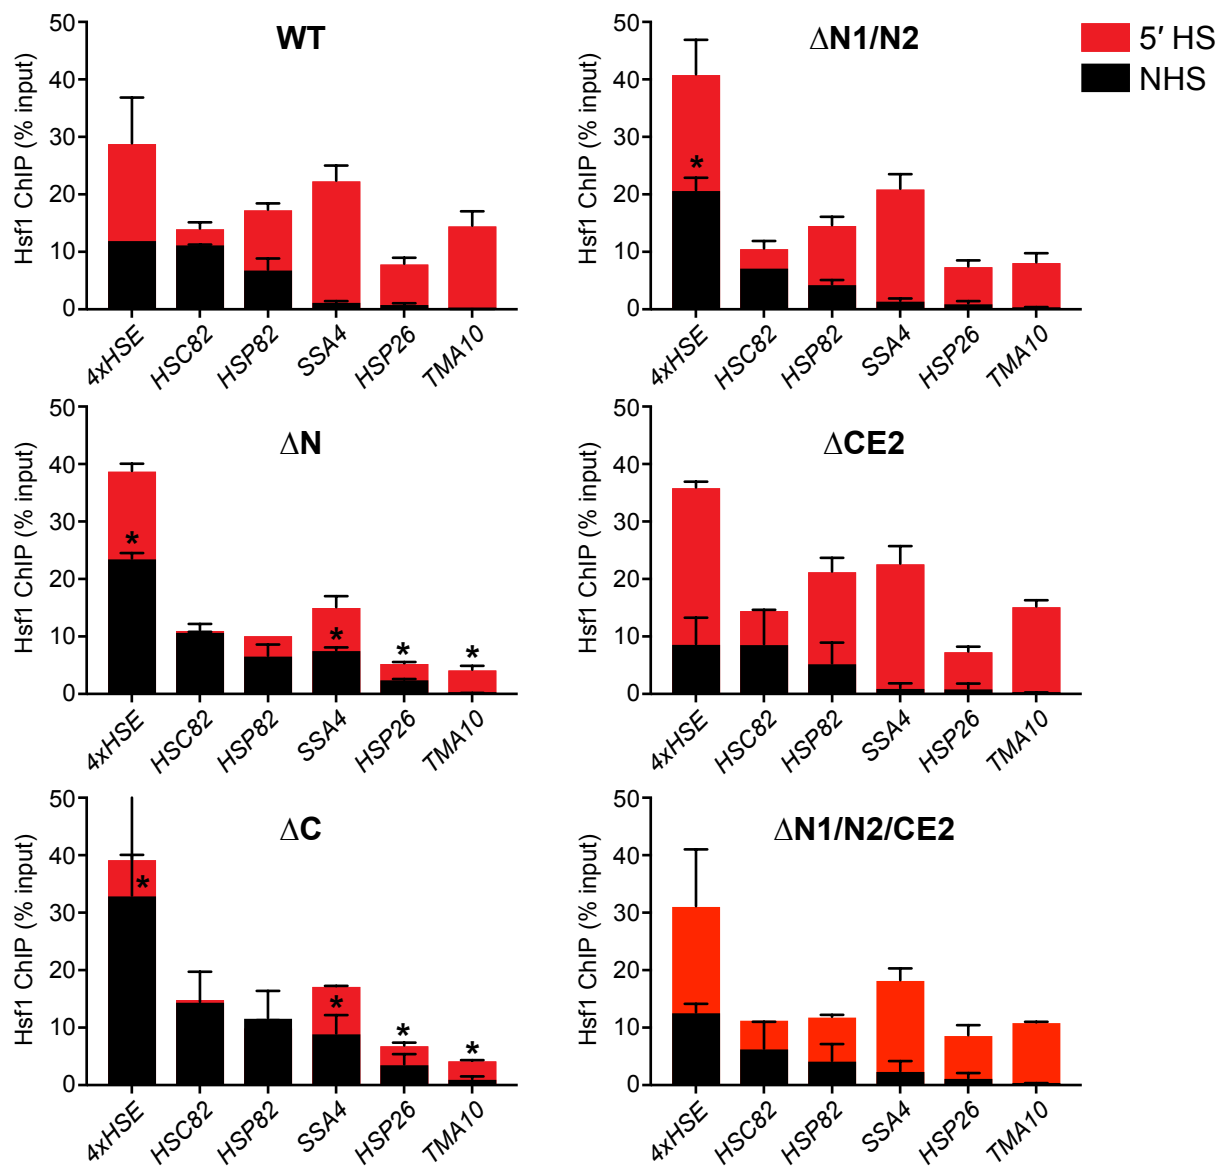

## Figure 4—figure supplement 1

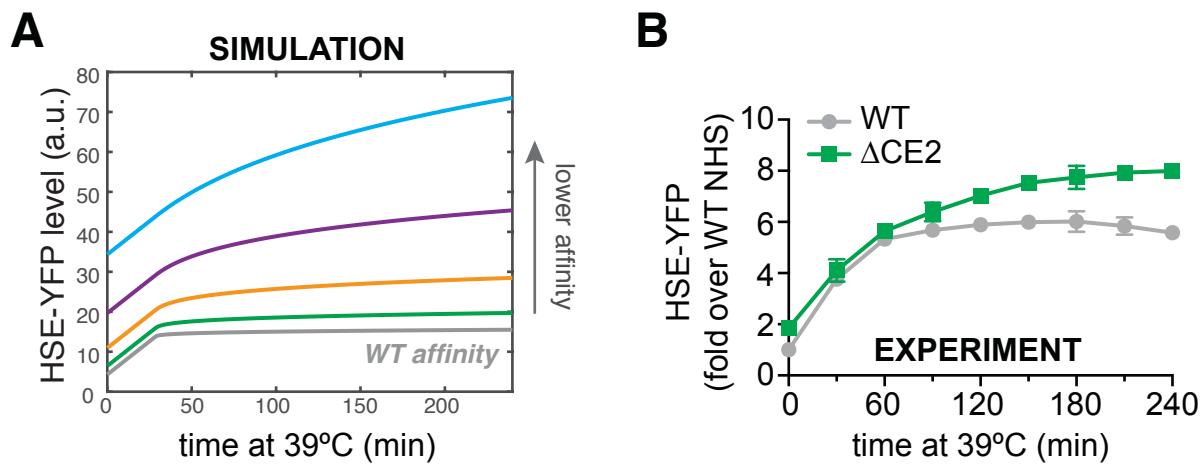

Source: https://www.biorxiv.org/content/10.1101/183137v1.full.pdf
